# Supplementary material
Source: Springer Nature journal article supplement (https://www.springermedizin.de/resource/supplementary/12904_2012_152_MOESM2_ESM.pdf/9517660)

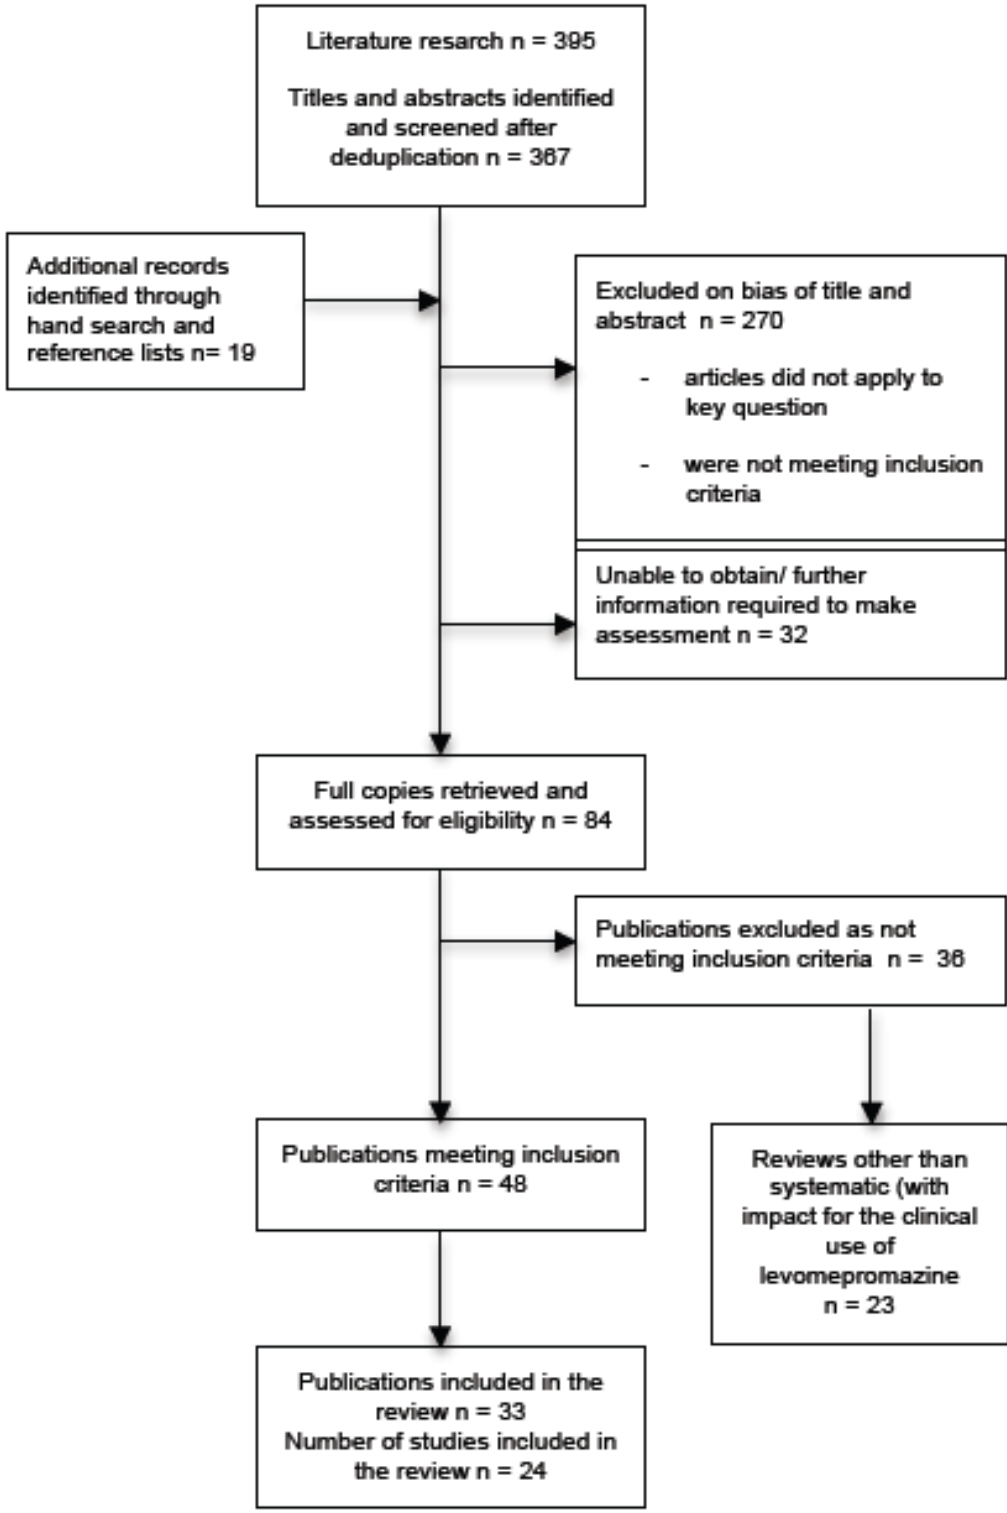

Supplement: MOESM2 [file 9517660]
